# Supplementary material
Source: MDPI journal article supplement (https://www.mdpi.com/2071-1050/14/9/5562)
Supplement: s1 [file s1]

Archive with 4 entries (4 files):
- File S1.pdf
- File S2.pdf
- Table S1.pdf
- Table S2.pdf
